# Supplementary material for: Perceptions, views and practices regarding antibiotic prescribing and stewardship among hospital physicians in Jakarta, Indonesia: a questionnaire-based survey
Source: HighWire-hosted journal article supplement (doi:10.1136/bmjopen-2021-054768), 2022-05-01
Supplement: bmjopen-2021-054768supp002_data_supplement.pdf [file bmjopen-2021-054768supp002_data_supplement.pdf]

Limato et al. Perceptions, views and practices regarding antibiotic prescribing and stewardship among hospital physicians in Jakarta, Indonesia

**Table S1** Survey response rate, overall and by hospital, department and professional hierarchy

|                                            | Total physicians invited | Total physicians responded | Response rate (%) | Respondents per physician type |                    |                      |                          |                  |
|--------------------------------------------|--------------------------|----------------------------|-------------------|--------------------------------|--------------------|----------------------|--------------------------|------------------|
|                                            |                          |                            |                   | Specialist/Consultant          | Resident           | General practitioner | Intern/Internship doctor | Other            |
| <b>Total</b>                               | <b>1896</b>              | <b>1007</b>                | <b>53.1%</b>      | <b>358 (35.6%)</b>             | <b>500 (49.7%)</b> | <b>113 (11.2%)</b>   | <b>10 (1.0%)</b>         | <b>18 (1.8%)</b> |
| <b>Hospital <sup>a</sup></b>               |                          |                            |                   |                                |                    |                      |                          |                  |
| 01                                         | 101 (5.3%)               | 70 (7.0%)                  | 69.3%             | 39 (10.9%)                     | 0 (0.0%)           | 27 (23.9%)           | 0 (0.0%)                 | 4 (22.2%)        |
| 02                                         | 255 (13.4%)              | 155 (15.4%)                | 60.8%             | 70 (19.6%)                     | 52 (10.4%)         | 26 (23.0%)           | 0 (0.0%)                 | 5 (27.8%)        |
| 03                                         | 143 (7.5%)               | 77 (7.7%)                  | 53.9%             | 41 (11.5%)                     | 0 (0.0%)           | 35 (31.0%)           | 0 (0.0%)                 | 1 (5.6%)         |
| 04                                         | 55 (2.9%)                | 44 (4.4%)                  | 80.0%             | 29 (8.1%)                      | 0 (0.0%)           | 11 (9.7%)            | 0 (0.0%)                 | 1 (5.6%)         |
| 05                                         | 1240 (65.4%)             | 622 (61.8%)                | 50.2%             | 152 (42.5%)                    | 448 (89.6%)        | 4 (3.5%)             | 10 (100.0%)              | 5 (27.8%)        |
| 06                                         | 102 (5.4%)               | 39 (3.9%)                  | 38.2%             | 27 (7.5%)                      | 0 (0.0%)           | 10 (8.9%)            | 0 (0.0%)                 | 2 (11.1%)        |
| <b>Sector <sup>b</sup></b>                 |                          |                            |                   |                                |                    |                      |                          |                  |
| Private                                    | 346                      | 186 (18.5%)                | 53.8%             | 107 (29.9%)                    | 0 (0.0%)           | 0 (0.0%)             | 72 (63.7%)               | 7 (38.9%)        |
| Public                                     | 1550                     | 821 (81.5%)                | 53.0%             | 251 (70.1%)                    | 500 (100.0%)       | 41 (36.3%)           | 10 (100.0%)              | 11 (61.1%)       |
| <b>Level of care <sup>c</sup></b>          |                          |                            |                   |                                |                    |                      |                          |                  |
| Secondary                                  | 1499                     | 777 (77.2%)                | 51.8%             | 136 (38.0%)                    | 0 (0.0%)           | 83 (73.5%)           | 0 (0.0%)                 | 8 (44.4%)        |
| Tertiary                                   | 397                      | 230 (22.8%)                | 57.9%             | 222 (62.0%)                    | 500 (100.0%)       | 30 (26.6%)           | 10 (100.0%)              | 10 (55.6%)       |
| <b>Department <sup>d</sup></b>             |                          |                            |                   |                                |                    |                      |                          |                  |
| <b>Surgery and surgical subspecialties</b> | <b>628</b>               | <b>371 (36.8)</b>          | <b>59.1%</b>      | <b>91 (24.5%)</b>              | <b>226 (60.9%)</b> | <b>1 (0.27%)</b>     | <b>4 (1.1%)</b>          | <b>0 (0.0%)</b>  |
| Obstetrics/gynaecology                     | 229                      | 146 (14.5%)                | 63.8%             | 51 (14.3%)                     | 91 (18.2%)         | 1 (0.88%)            | 1 (10.0%)                | 0 (0.0%)         |
| Surgery                                    | 210                      | 122 (12.1%)                | 58.1%             | 2 (11.1%)                      | 74 (14.8%)         | 0 (0.0%)             | 3 (30.0%)                | 0 (0.0%)         |
| Orthopaedics                               | 72                       | 57 (5.7%)                  | 44.4%             | 25 (7.0%)                      | 32 (6.4%)          | 0 (0.0%)             | 0 (0.0%)                 | 0 (0.0%)         |
| Ear-nose-throat                            | 74                       | 32 (3.2%)                  | 77.0%             | 12 (3.4%)                      | 19 (3.8%)          | 0 (0.0%)             | 0 (0.0%)                 | 0 (0.0%)         |
| Urology                                    | 43                       | 14 (1.4%)                  | 32.6%             | 1 (1.1%)                       | 10 (2.0%)          | 0 (0.0%)             | 0 (0.0%)                 | 0 (0.0%)         |
| <b>Medicine and medical subspecialties</b> | <b>456</b>               | <b>232 (23.0%)</b>         | <b>50.9%</b>      | <b>115 (49.6%)</b>             | <b>109 (47.0%)</b> | <b>0 (0.0%)</b>      | <b>3 (1.3%)</b>          | <b>5 (2.2%)</b>  |
| Internal medicine                          | 261                      | 128 (12.7%)                | 49.0%             | 59 (16.5%)                     | 67 (13.4%)         | 0 (0.0%)             | 0 (0.0%)                 | 2 (11.1%)        |
| Neurology                                  | 74                       | 63 (6.3%)                  | 85.1%             | 17 (4.8%)                      | 40 (8.0%)          | 0 (0.0%)             | 3 (30.0%)                | 3 (16.7%)        |
| Pulmonology                                | 21                       | 15 (1.5%)                  | 71.4%             | 15 (4.2%)                      | 0 (0.0%)           | 0 (0.0%)             | 0 (0.0%)                 | 0 (0.0%)         |
| Dermato-venerology                         | 77                       | 14 (1.4%)                  | 18.2%             | 12 (0.0%)                      | 2 (3.4%)           | 0 (0.0%)             | 0 (0.0%)                 | 0 (0.0%)         |
| Cardiology                                 | 23                       | 12 (1.2%)                  | 52.2%             | 12 (3.4%)                      | 0 (0.0%)           | 0 (0.0%)             | 0 (0.0%)                 | 0 (0.0%)         |
| <b>Acute specialties <sup>e</sup></b>      | <b>96</b>                | <b>156 (15.5)</b>          | <b>162.5%</b>     | <b>28 (17.9%)</b>              | <b>67 (42.9%)</b>  | <b>68 (43.6%)</b>    | <b>2 (1.3%)</b>          | <b>1 (0.64%)</b> |
| Anaesthesiology                            | 96                       | 72 (7.2%)                  | 75.0%             | 4 (1.1%)                       | 66 (13.2%)         | 0 (0.0%)             | 2 (20.0%)                | 0 (0.0%)         |

Limato et al. Perceptions, views and practices regarding antibiotic prescribing and stewardship among hospital physicians in Jakarta, Indonesia

|                                         | Total physicians invited | Total physicians responded | Response rate (%) | Respondents per physician type |                   |                      |                          |                  |
|-----------------------------------------|--------------------------|----------------------------|-------------------|--------------------------------|-------------------|----------------------|--------------------------|------------------|
|                                         |                          |                            |                   | Specialist/Consultant          | Resident          | General practitioner | Intern/Internship doctor | Other            |
| Emergency dept <sup>°</sup>             | -                        | 57 (5.7%)                  | -                 | 0 (0.0%)                       | 0 (0.0%)          | 57 (50.4%)           | 0 (0.0%)                 | 0 (0.0%)         |
| Intensive Care Unit <sup>°</sup>        | -                        | 27 (2.7%)                  | -                 | 14 (3.9%)                      | 1 (0.2%)          | 11 (9.7%)            | 0 (0.0%)                 | 1 (5.6%)         |
| <b>Other departments</b>                | <b>539</b>               | <b>244 (24.2)</b>          | <b>45.2%</b>      | <b>90 (36.9%)</b>              | <b>98 (40.2%)</b> | <b>24 (9.8%)</b>     | <b>1 (0.41%)</b>         | <b>10 (4.1%)</b> |
| Paediatrics                             | 202                      | 54 (5.4%)                  | 26.7%             | 28 (7.8%)                      | 25 (5.0%)         | 0 (0.0%)             | 0 (0.0%)                 | 0 (0.0%)         |
| Ophthalmology                           | 102                      | 39 (3.9%)                  | 38.2%             | 22 (6.2%)                      | 17 (3.4%)         | 0 (0.0%)             | 0 (0.0%)                 | 0 (0.0%)         |
| Multiple/unspecified units <sup>°</sup> | -                        | 33 (3.3%)                  | -                 | 5 (1.4%)                       | 5 (1.0%)          | 21 (18.6%)           | 1 (10.0%)                | 0 (0.0%)         |
| Rehabilitation                          | 70                       | 32 (3.2%)                  | 45.7%             | 4 (1.1%)                       | 28 (5.6%)         | 0 (0.0%)             | 0 (0.0%)                 | 0 (0.0%)         |
| Psychiatry                              | 54                       | 30 (3.0%)                  | 55.6%             | 11 (3.1%)                      | 19 (3.8%)         | 0 (0.0%)             | 0 (0.0%)                 | 0 (0.0%)         |
| Dentist                                 | 49                       | 27 (2.7%)                  | 55.1%             | 11 (3.1%)                      | 1 (0.20%)         | 3 (2.7%)             | 0 (0.0%)                 | 10 (55.6%)       |
| Other                                   | 39                       | 25 (2.5%)                  | 64.1%             | 4 (1.1%)                       | 1 (0.20%)         | 20 (17.7%)           | 0 (0.0%)                 | 0 (0.0%)         |
| Microbiology                            | 4                        | 3 (0.30%)                  | 75.0%             | 2 (0.56%)                      | 1 (0.20%)         | 0 (0.0%)             | 0 (0.0%)                 | 0 (0.0%)         |
| Laboratory                              | 19                       | 1 (0.10%)                  | 5.3%              | 1 (0.28%)                      | 0 (0.0%)          | 0 (0.0%)             | 0 (0.0%)                 | 0 (0.0%)         |
| Missing                                 | -                        | 4 (0.40%)                  | -                 | 2 (0.56%)                      | 1 (0.20%)         | 0 (0.0%)             | 0 (0.0%)                 | 0 (0.0%)         |

Data are reported as n (%).

Doctor type was missing for 8 respondents, across <sup>a</sup> hospitals (02 (2), 03 (3), and 05 (3)); <sup>b</sup> sector (public 8, private 0); <sup>c</sup> level of care (secondary 3, tertiary 5); and <sup>d</sup> departments (obstetrics/gynaecology 2; ENT 1; paediatrics 1; multiple units 1; dental/oral surgery 2; missing dept 1).

<sup>°</sup> Invitations to participate in the survey were sent out according to primary work units; the discrepancies reported for the acute and other departments result from the fact that n=177 respondents who worked across multiple units (mostly GPs and internship doctors) indicated a different primary department on their questionnaire.

Limato et al. Perceptions, views and practices regarding antibiotic prescribing and stewardship among hospital physicians in Jakarta, Indonesia

**Table S2.** Five-point Likert scale responses for the 40-item questionnaire

| Item # | No of respondents | Strongly disagree (1) | Disagree (2) | Neutral (3) | Agree (4)  | Strongly agree (5) |
|--------|-------------------|-----------------------|--------------|-------------|------------|--------------------|
| Q1     | 1005              | 3 (0.30)              | 26 (2.6)     | 168 (16.7)  | 452 (45.0) | 356 (35.4)         |
| Q2     | 1006              | 0 (0.0)               | 7 (0.70)     | 55 (5.5)    | 505 (50.2) | 439 (43.6)         |
| Q3     | 1003              | 0 (0.0)               | 6 (0.60)     | 43 (4.3)    | 472 (47.1) | 482 (48.1)         |
| Q4     | 1005              | 19 (1.9)              | 98 (9.8)     | 173 (17.2)  | 497 (49.5) | 218 (21.7)         |
| Q5     | 1004              | 2 (0.20)              | 49 (4.9)     | 145 (14.4)  | 514 (51.2) | 294 (29.3)         |
| Q6     | 1003              | 0 (0.0)               | 29 (2.9)     | 136 (13.6)  | 516 (51.5) | 322 (32.1)         |
| Q7     | 1004              | 12 (1.2)              | 53 (5.3)     | 288 (28.7)  | 460 (45.8) | 191 (19.0)         |
| Q8     | 1002              | 6 (0.60)              | 81 (8.1)     | 345 (34.4)  | 444 (44.3) | 126 (12.6)         |
| Q9     | 1005              | 71 (7.1)              | 397 (39.5)   | 311 (31.0)  | 188 (18.7) | 38 (3.8)           |
| Q10    | 1005              | 32 (3.2)              | 299 (29.8)   | 363 (36.1)  | 256 (25.5) | 55 (5.5)           |
| Q11    | 1005              | 8 (0.80)              | 34 (3.4)     | 102 (10.2)  | 506 (50.4) | 355 (35.3)         |
| Q12    | 1005              | 18 (1.8)              | 213 (21.2)   | 417 (41.5)  | 286 (28.5) | 71 (7.1)           |
| Q13    | 1005              | 11 (1.1)              | 97 (9.7)     | 321 (31.9)  | 515 (51.2) | 61 (6.1)           |
| Q14    | 1005              | 12 (1.2)              | 121 (12.0)   | 324 (32.2)  | 468 (46.6) | 80 (8.0)           |
| Q15    | 1006              | 7 (0.70)              | 73 (7.3)     | 195 (19.4)  | 623 (61.9) | 108 (10.7)         |
| Q16    | 1006              | 67 (6.7)              | 334 (33.2)   | 267 (26.5)  | 276 (27.4) | 62 (6.2)           |
| Q17    | 1005              | 2 (0.20)              | 2 (0.20)     | 48 (4.8)    | 431 (42.9) | 522 (51.9)         |
| Q18    | 1006              | 0 (0.0)               | 6 (0.60)     | 42 (4.2)    | 467 (46.4) | 491 (48.8)         |
| Q19    | 1005              | 1 (0.10)              | 7 (0.70)     | 105 (10.5)  | 545 (54.3) | 347 (34.5)         |
| Q20    | 1004              | 3 (0.30)              | 34 (3.4)     | 180 (17.9)  | 511 (50.9) | 276 (27.5)         |
| Q21    | 1006              | 60 (6.0)              | 440 (43.7)   | 269 (26.7)  | 204 (20.3) | 33 (3.3)           |
| Q22    | 1006              | 89 (8.9)              | 448 (44.5)   | 254 (25.3)  | 196 (19.5) | 19 (1.9)           |
| Q23    | 1002              | 19 (1.9)              | 124 (12.4)   | 288 (28.7)  | 464 (46.3) | 107 (10.7)         |
| Q24    | 1005              | 213 (21.2)            | 480 (47.8)   | 189 (18.8)  | 104 (10.4) | 19 (1.9)           |
| Q25    | 1005              | 51 (5.1)              | 285 (28.4)   | 301 (30.0)  | 348 (34.6) | 20 (2.0)           |
| Q26    | 1006              | 55 (5.5)              | 354 (35.2)   | 245 (24.4)  | 330 (32.8) | 22 (2.2)           |
| Q27    | 1005              | 231 (22.3)            | 538 (53.5)   | 138 (13.7)  | 90 (9.0)   | 8 (0.80)           |
| Q28    | 1006              | 0 (0.0)               | 15 (1.5)     | 54 (5.4)    | 526 (52.3) | 411 (40.9)         |
| Q29    | 1006              | 2 (0.20)              | 6 (0.60)     | 71 (7.1)    | 585 (58.2) | 342 (34.0)         |
| Q30    | 1006              | 7 (0.70)              | 11 (1.1)     | 97 (9.6)    | 582 (57.9) | 309 (30.7)         |
| Q31    | 1005              | 2 (0.20)              | 7 (0.70)     | 109 (10.89) | 620 (61.7) | 267 (26.6)         |

Limato et al. Perceptions, views and practices regarding antibiotic prescribing and stewardship among hospital physicians in Jakarta, Indonesia

| Item # | No of respondents | Strongly disagree (1) | Disagree (2) | Neutral (3) | Agree (4)  | Strongly agree (5) |
|--------|-------------------|-----------------------|--------------|-------------|------------|--------------------|
| Q32    | 1004              | 3 (0.30)              | 25 (2.5)     | 206 (20.5)  | 568 (56.6) | 202 (20.1)         |
| Q33    | 1005              | 2 (0.20)              | 14 (1.4)     | 101 (10.1)  | 574 (57.1) | 314 (31.2)         |
| Q34    | 1006              | 1 (0.10)              | 7 (0.70)     | 70 (7.0)    | 702 (69.8) | 226 (22.5)         |
| Q35    | 1006              | 0 (0.0)               | 4 (0.40)     | 31 (3.1)    | 646 (64.2) | 325 (32.3)         |
| Q36    | 1007              | 1 (0.10)              | 13 (1.3)     | 83 (8.2)    | 675 (67.0) | 235 (23.3)         |
| Q37    | 1006              | 2 (0.20)              | 17 (1.7)     | 128 (12.7)  | 657 (65.3) | 202 (20.1)         |
| Q38    | 1006              | 0 (0.0)               | 10 (0.99)    | 66 (6.6)    | 616 (61.2) | 314 (31.2)         |
| Q39    | 1006              | 0 (0.0)               | 4 (0.40)     | 49 (4.9)    | 617 (61.3) | 336 (33.4)         |
| Q40    | 1006              | 0 (0.0)               | 4 (0.40)     | 43 (4.3)    | 612 (60.8) | 347 (34.5)         |

Data are also shown in Figure 1.

Limato et al. Perceptions, views and practices regarding antibiotic prescribing and stewardship among hospital physicians in Jakarta, Indonesia

**Table S3** The latent factors of antibiotic prescribing (full table)

| Factor | Factor label                                    | Survey questions included in the factor loading                                                                                                       | Loadings | Reliability (Cronbach's $\alpha$ ) |
|--------|-------------------------------------------------|-------------------------------------------------------------------------------------------------------------------------------------------------------|----------|------------------------------------|
| 1      | Awareness of AMS activities                     | Q33: Additional staff education on antimicrobial prescribing is needed                                                                                | 0.5202   | 0.8734                             |
|        |                                                 | Q34: Regular audit and feedback encourage me to prescribe antibiotics prudently                                                                       | 0.6151   |                                    |
|        |                                                 | Q35: Rapid and accurate diagnostic tests are useful for diagnosis of infectious diseases and guidance on antibiotic therapy                           | 0.6714   |                                    |
|        |                                                 | Q36: To reduce antibiotic overuse in hospitals, implementation of antibiotic restriction (e.g. antibiotic tiers) is a useful measure                  | 0.6428   |                                    |
|        |                                                 | Q37: To curb antimicrobial resistance, regular consultations or ward rounds with a clinical microbiologist or infectious disease physician are useful | 0.7046   |                                    |
|        |                                                 | Q38: To curb antimicrobial resistance, doctors need to have timely access to microbiological test results to guide antibiotic therapy                 | 0.7197   |                                    |
|        |                                                 | Q39: Up-to-date information on hospital antimicrobial resistance patterns is important for developing hospital antibiotic guidelines                  | 0.7374   |                                    |
|        |                                                 | Q40: Effective infection prevention and control in the hospital reduces antimicrobial resistance                                                      | 0.7067   |                                    |
| 2      | Awareness of AMS purposes                       | Q28: I am aware that my hospital has an antimicrobial stewardship program (ASP)                                                                       | 0.6224   | 0.8334                             |
|        |                                                 | Q29: I understand what the purpose of ASP is                                                                                                          | 0.6957   |                                    |
|        |                                                 | Q30: ASP improve patient care                                                                                                                         | 0.7744   |                                    |
|        |                                                 | Q31: ASP reduces the problem of antimicrobial resistance                                                                                              | 0.7532   |                                    |
|        |                                                 | Q32: ASP reduces this hospital's infection rates                                                                                                      | 0.6670   |                                    |
| 3      | Views regarding rational antibiotic prescribing | Q11: Antibiotics are overused in Indonesia                                                                                                            | 0.5138   | 0.6961                             |
|        |                                                 | Q17: More judicious use of antibiotics would decrease antimicrobial resistance                                                                        | 0.7362   |                                    |
|        |                                                 | Q18: Following evidence-based antibiotic guidelines will help optimize treatment outcomes                                                             | 0.6565   |                                    |
|        |                                                 | Q19: In general, rational antibiotic prescribing for my patients is high on my list of priorities                                                     | 0.5246   |                                    |
|        |                                                 | Q20: Developing hospital antibiotic guidelines is more useful than applying international guidelines                                                  | 0.3499   |                                    |
| 4      | Confidence in antibiotic prescribing decisions  | Q12: Antibiotics are overused in this hospital                                                                                                        | -0.4550  | 0.6997                             |
|        |                                                 | Q16: Restrictions on antibiotics impair my ability to provide good patient care                                                                       | 0.4031   |                                    |
|        |                                                 | Q21: I am often unsure if a patient needs an antibiotic or not                                                                                        | 0.5640   |                                    |
|        |                                                 | Q22: I am often unsure which antibiotic to prescribe                                                                                                  | 0.5670   |                                    |
|        |                                                 | Q24: Patients with high fever ( $\geq 39^{\circ}\text{C}$ ) must be treated with antibiotics                                                          | 0.4794   |                                    |
|        |                                                 | Q25: If I am uncertain about the diagnosis of infection, but think it is possible, I feel                                                             | 0.6741   |                                    |

Limato et al. Perceptions, views and practices regarding antibiotic prescribing and stewardship among hospital physicians in Jakarta, Indonesia

| Factor | Factor label                               | Survey questions included in the factor loading                                                                                                                                      | Loadings | Reliability (Cronbach's $\alpha$ ) |
|--------|--------------------------------------------|--------------------------------------------------------------------------------------------------------------------------------------------------------------------------------------|----------|------------------------------------|
|        |                                            | safer prescribing an antibiotic                                                                                                                                                      |          |                                    |
|        |                                            | Q26: Fear of patient deterioration or complications leads me to prescribe antibiotics more freely                                                                                    | 0.7092   |                                    |
|        |                                            | Q27: I frequently prescribe antibiotics because patients or their relatives insist on it                                                                                             | 0.6318   |                                    |
| 5      | Perception of AMR as a significant problem | Q1: Antimicrobial resistance is a significant problem in this hospital                                                                                                               | 0.5701   | 0.6967                             |
|        |                                            | Q2: Antimicrobial resistance is a significant problem in Indonesia                                                                                                                   | 0.5742   |                                    |
|        |                                            | Q3: A cause of antimicrobial resistance is using too many antimicrobial drugs                                                                                                        | 0.5361   |                                    |
|        |                                            | Q4: Lack of hand disinfection by healthcare workers causes spread of antimicrobial resistance                                                                                        | 0.5725   |                                    |
|        |                                            | Q5: Use of broad-spectrum antibiotics can increase antimicrobial resistance when narrower-spectrum antibiotics are available that are equally effective                              | 0.5480   |                                    |
|        |                                            | Q6: Antibiotic resistance is also a problem outside of the hospital, in communities                                                                                                  | 0.4766   |                                    |
| 6      | Immediate actions to contain AMR           | Q7: In this hospital, patient rooms are cleaned according to hospital cleaning protocol once a patient with a multidrug-resistant organism (MDRO) has been discharged                | 0.6058   | 0.5695                             |
|        |                                            | Q8: Adherence to hand-hygiene protocols is excellent at this hospital                                                                                                                | 0.6368   |                                    |
|        |                                            | Q13: Microbiology laboratory results are efficiently communicated to the treating physician                                                                                          | 0.5116   |                                    |
|        |                                            | Q14: I regularly refer to/consider the antibiotic susceptibility patterns at this hospital/institution (i.e. the institutional antibiogram) when empirically prescribing antibiotics | 0.6115   |                                    |
|        |                                            | Q15: If medically appropriate, intravenous antibiotics should be stepped down to an oral alternative after three days                                                                | 0.3617   |                                    |
|        |                                            | Q23: I will stop antibiotics that others have prescribed in the absence of an appropriate indication                                                                                 | 0.3892   |                                    |

Abbreviations: AMS, antibiotic stewardship; ASP, antibiotic stewardship programme; IPC, infection prevention and control

Data are summarised in Table 3

Item #9 and 10 were excluded from the analysis, as explained in Results.

Limato et al. Perceptions, views and practices regarding antibiotic prescribing and stewardship among hospital physicians in Jakarta, Indonesia

**Figure S1** Scree plot showing eigenvalues for the 40 factors

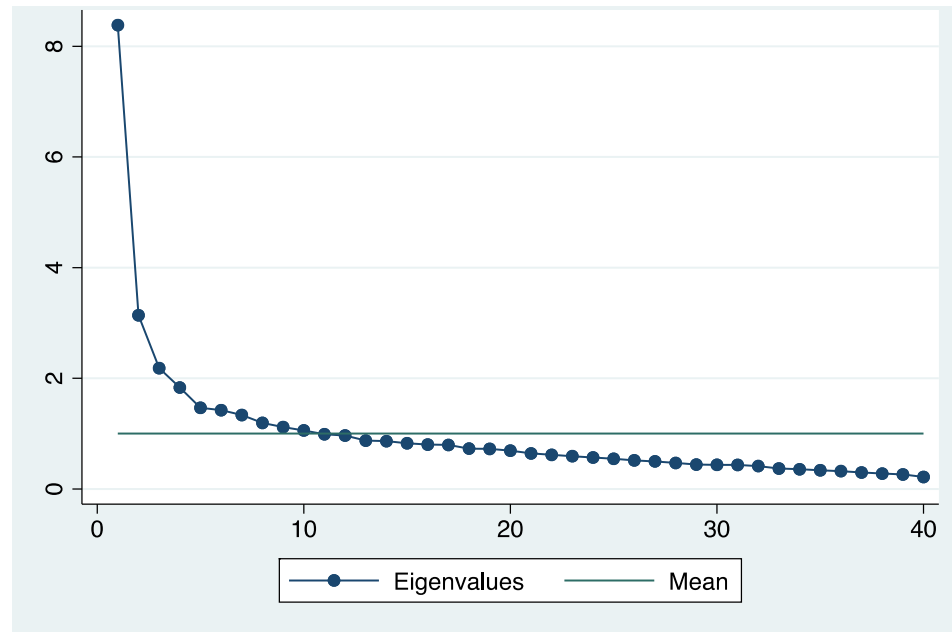

Limato et al. Perceptions, views and practices regarding antibiotic prescribing and stewardship among hospital physicians in Jakarta, Indonesia

**Figure S2** Parallel analysis showing adjusted eigenvalues for the 40 factors.

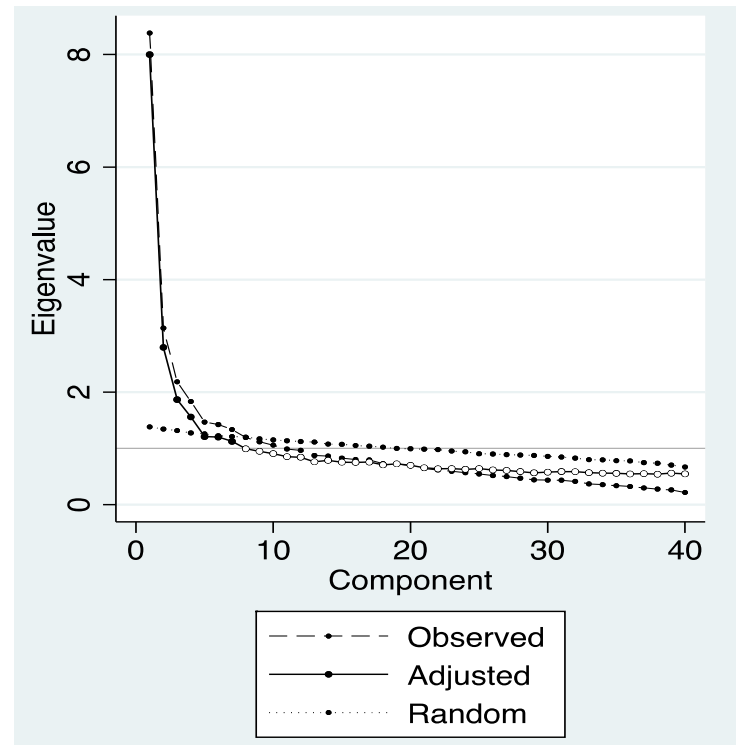

Parallel analysis adjusted the original eigenvalues for sampling error-induced collinearity among the variables to arrive at the adjusted eigenvalues.
